# Supplementary material
Source: PubMed Central journal article supplement (PMC7745425)
Supplement: ao0c04436_si_001.pdf [file ao0c04436_si_001.pdf]

## Supporting Information

### Microfluidic affinity sensor based on molecularly imprinted polymer for ultra-sensitive detection of chlorpyrifos

Shalini Nagabooshanam<sup>†</sup>, Souradeep Roy<sup>†</sup>, Sujit Deshmukh<sup>‡</sup>, Shikha Wadhwa<sup>†</sup>, Indra Sulania<sup>§</sup>, Ashish Mathur<sup>\*†</sup>, Satheesh Krishnamurthy<sup>††</sup>, Lalit M Bharadwaj, Susanta S Roy<sup>‡\*</sup>

<sup>†</sup>Amity Institute of Nanotechnology, Amity University, Sector-125, Noida-201301, UP.

<sup>††</sup>Nanoscale Energy and Surface Engineering, School of Engineering and Innovation, The Open University, Milton Keynes, MK 76AA, United Kingdom.

<sup>§</sup>Inter University Accelerator Centre, Aruna Asaf Ali Marg, New Delhi 110067, India.

<sup>‡</sup>Department of Physics, School of Natural Sciences, Shiv Nadar University, Gautam Budh Nagar 201314, Uttar Pra-desh, India.

\*Dr Ashish Mathur

Amity Institute of Nanotechnology,  
Amity University, Sector-125, Noida-201301, UP.  
Email- amathur@amity.edu, nanoashish@gmail.com.

\*Dr Susanta S Roy

Department of Physics, School of Natural Sciences ,  
Shiv Nadar University, Gautam Budh Nagar 201314  
Email- susanta.roy@snu.edu.in

**CONTENTS**

**PAGE NUMBER**

Figure S1

S3

Figure S2

S4

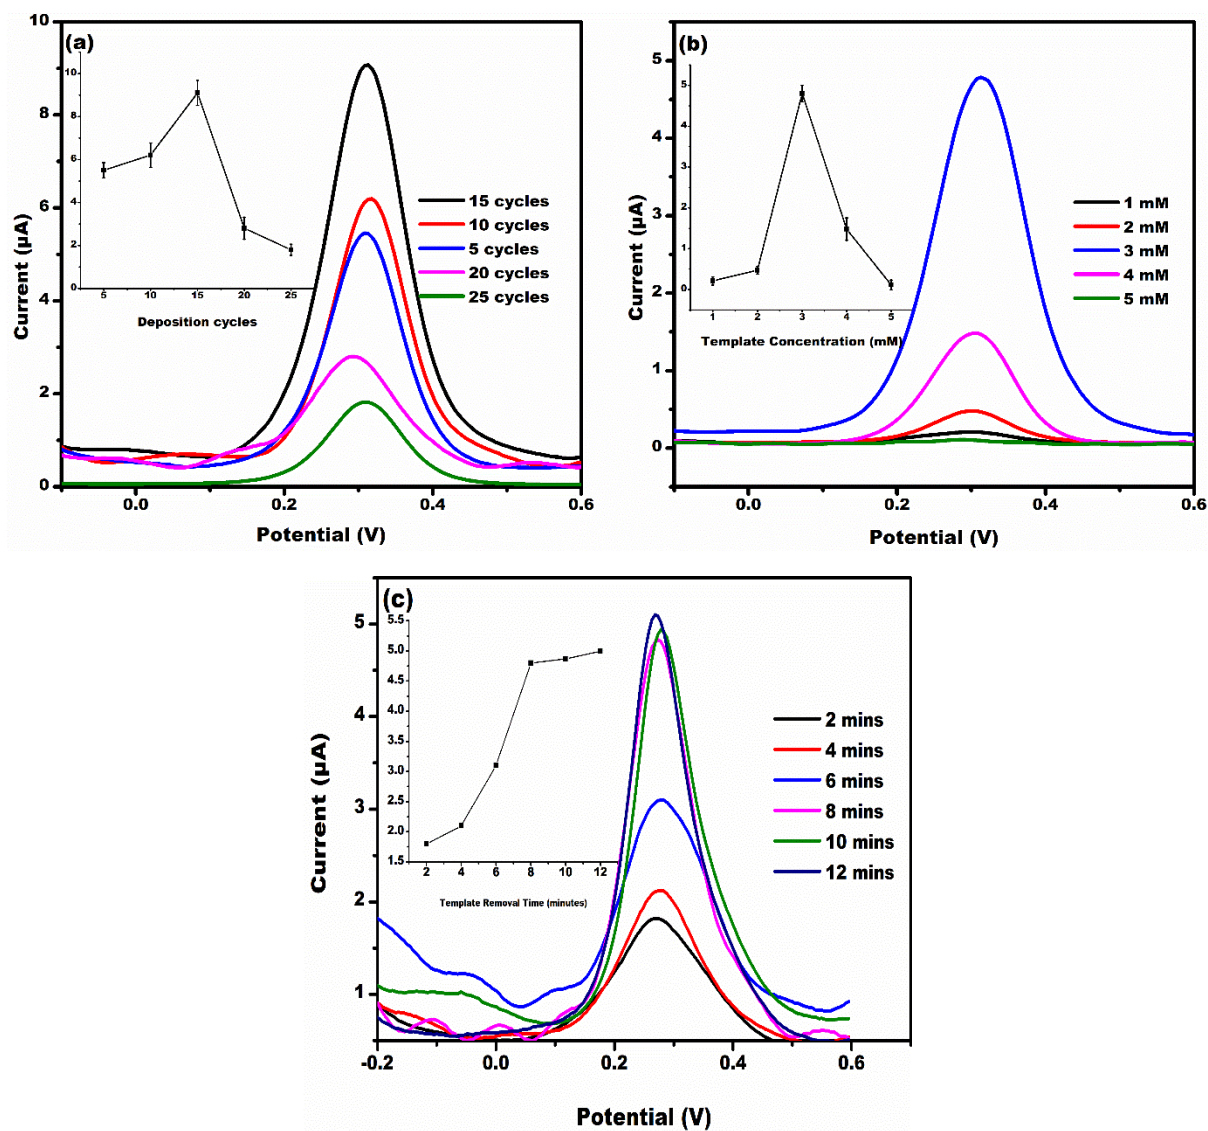

**Figure S1.** Optimization studies of a) Deposition cycles, b) Template to monomer ratio, c) Template removal time.

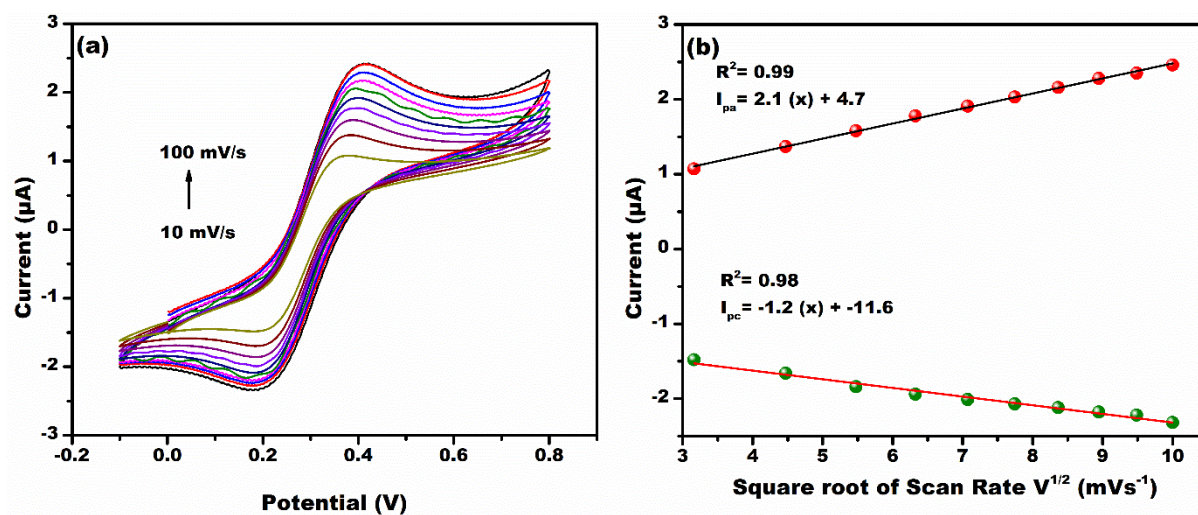

**Figure S2.** a) Effect of scan rate a) CV at different scan rates, b) Calibration plot depicting the dependence of anodic and cathodic peak current with the change in square root of scan rate.
